# Supplementary material for: Multilocus Sequence Typing for Interpreting Blood Isolates of Staphylococcus epidermidis
Source: Interdiscip Perspect Infect Dis. 2014 Mar 2;2014:787458. doi: 10.1155/2014/787458 (PMC3958685; doi:10.1155/2014/787458)
Supplement: Supplementary file 1 — A supplemental table of all of our MLST data. [file 787458.f1.xlsx]

## Sheet: Sheet1
ID	Site	arcC	aroE	gtr	mutS	pyr	tpiA	yqil	ST
1	skin	1	1	1	2	5	1	1	190
2	skin	1	1	1	2	2	1	16	422
3	skin	1	1	1	6	2	1	1	110
4	skin	1	5	2	6	2	1	6	73
5	skin	1	1	2	6	2	1	33	256
6	skin	1	1	7	6	2	1	1	423
7	skin	1	5	2	6	2	1	6	73
8	skin	1	5	2	6	2	1	6	73
9	skin	12	1	9	6	6	5	8	424
10	skin	2	1	1	1	2	1	1	143
11	skin	1	1	1	2	2	1	1	5
12	skin	1	1	7	2	2	1	1	136
13	skin	3	16	2	5	3	1	52	482
14	skin	7	1	2	2	4	1	1	2
15	skin	1	1	2	2	2	1	1	6
16	skin	1	1	2	1	2	1	1	89
17	skin	12	1	6	1	11	38	4	481
18	skin	2	1	2	2	4	1	1	35
19	skin	8	2	2	4	9	6	9	72
20	skin	8	1	42	37	42	16	13	475
21	skin	1	1	1	5	2	1	1	487
22	skin	2	1	2	2	4	1	1	35
23	skin	35	3	6	38	3	38	2	479
24	skin	1	1	1	2	2	39	25	480
25	skin	1	5	2	6	2	1	6	73
26	true positive	1	2	1	2	1	1	10	83
27	true positive	1	2	1	2	1	1	10	83
28	true positive	1	1	1	2	1	1	10	425
29	true positive	1	2	1	2	2	1	1	172
30	true positive	1	2	1	2	1	1	10	83
31	true positive	1	2	1	2	1	1	10	83
32	true positive	1	1	1	2	2	1	1	5
33	true positive	7	1	2	2	4	1	1	2
34	true positive	1	1	1	2	2	1	1	5
35	true positive	7	1	2	2	4	1	1	2
36	true positive	7	1	2	2	4	1	1	2
37	true positive	1	1	1	2	2	1	25	210
38	true positive	7	1	2	2	4	1	1	2
39	true positive	7	1	2	2	4	1	1	2
40	true positive	1	1	2	2	1	1	3	20
41	true positive	7	1	2	2	4	1	1	2
42	true positive	56	1	2	2	4	1	1	476
43	true positive	28	1	15	5	38	1	4	478
44	true positive	2	1	1	1	2	1	1	59
45	true positive	1	13	41	6	2	37	1	477
46	true positive	7	1	2	2	4	1	1	2
47	true positive	7	1	2	2	4	1	1	2
48	true positive	1	1	1	2	1	1	1	130
49	true positive	1	1	2	6	2	16	1	218
50	true positive	1	1	1	2	1	1	1	130
51	true positive	1	1	1	2	2	1	1	5
52	true positive	2	1	1	1	2	1	1	59
53	true positive	2	1	2	2	15	1	1	16
54	true positive	1	1	1	2	2	1	1	5
55	true positive	1	1	1	2	2	1	1	5
56	true positive	7	1	2	2	4	1	1	2
57	true positive	1	1	1	2	2	1	1	5
58	true positive	2	1	2	2	4	1	1	35
59	true positive	1	6	1	6	2	1	22	167
60	true positive	1	1	1	2	2	1	1	5
61	true positive	2	1	1	1	2	1	1	59
62	true positive	7	1	2	2	4	1	1	2
63	true positive	7	1	2	2	4	1	1	2
64	true positive	7	1	2	2	4	1	1	2
65	true positive	1	1	1	2	2	1	1	5
66	true positive	1	1	1	2	2	1	1	5
67	true positive	1	2	1	2	1	1	10	83
68	true positive	1	18	6	2	2	1	1	69
69	true positive	7	1	2	2	4	1	1	2
70	true positive	1	1	6	2	2	1	1	17
71	true positive	1	1	6	2	2	1	1	17
72	true positive	7	1	2	2	4	1	1	2
73	true positive	1	1	1	6	2	1	1	110
74	true positive	1	1	1	2	2	1	1	5
75	true positive	1	2	2	2	2	1	3	297
76	contaminant	7	1	1	2	4	1	1	242
77	contaminant	1	1	1	2	1	1	1	130
78	contaminant	1	1	1	2	5	1	1	190
79	contaminant	7	1	2	2	4	1	1	2
80	contaminant	1	1	1	2	2	1	1	5
81	contaminant	7	1	1	2	4	1	1	242
82	contaminant	28	1	1	5	38	1	4	484
83	contaminant	7	1	2	2	4	1	1	2
84	contaminant	1	1	1	1	2	1	1	57
85	contaminant	1	6	6	1	2	1	10	173
86	contaminant	8	7	1	4	12	2	2	485
87	contaminant	1	1	1	2	2	1	1	5
88	contaminant	7	1	2	2	4	1	4	48
89	contaminant	7	1	1	2	4	1	1	242
90	contaminant	2	1	2	2	15	1	1	16
91	contaminant	8	7	12	4	12	2	2	19
92	contaminant	8	2	2	4	9	1	9	486
93	contaminant	1	1	1	2	2	1	1	5
94	contaminant	2	1	1	1	2	1	1	59
95	contaminant	7	1	2	2	4	1	1	2
96	contaminant	7	1	2	2	4	1	1	2
97	contaminant	7	1	2	2	4	1	1	2
98	contaminant	2	1	1	1	2	1	1	59
99	contaminant	1	1	1	5	2	1	1	487
100	contaminant	7	1	2	2	4	1	1	2
